# Supplementary material for: The core metabolome and root exudation dynamics of three phylogenetically distinct plant species
Source: PubMed Central journal article supplement (PMC10039077; doi:10.1038/s41467-023-37164-x), 2023-03-24
Supplement: 41467_2023_37164_MOESM3_ESM.pdf [file 41467_2023_37164_MOESM3_ESM.pdf]

## **Description of Additional Supplementary Files:**

**Supplementary Data 1:** Metabolomics data

**Supplementary Data 2:** LCMS parameters
