# Supplementary material for: The core metabolome and root exudation dynamics of three phylogenetically distinct plant species
Source: Nat Commun. 2023 Mar 24;14:1649. doi: 10.1038/s41467-023-37164-x (PMC10039077; doi:10.1038/s41467-023-37164-x)
Supplement: Supplementary file 5 — Supplementary Data 2 [file 41467_2023_37164_MOESM5_ESM.xlsx]

## Sheet: LCMS parameters table
Table S2 LCMS methods
Supplementary Table. LC-MS/MS parameters
Mass spectrometer parameters				LC parameters
	Instrument	Thermo Q Exactive			LC stack:	Agilent 1290 UHPLC
	data acquisition mode	Full MS -> ddMS2			Autosampler temperature:	4 degrees C
	ion polarity mode	injected 2x: first in positive mode, then in negative mode			Injection volume:	3 uL
					Injection draw and eject speeds:	20 uL/min @ 2mm draw position
Source settings					Additional injection settings:	2 second equilibration time and 5x flush out factor
	Sheath gas flow rate	55			Needle wash:	3 seconds, mode = flush port using 50:50 v/v methanol:water
	Aux gas flow rate	20			Control notes:	Internal (in all samples) and external (injected every 10 samples) standards were used for quality control purposes, methanol blanks injected between samples
	Sweep gas flow rate	2
	Spray voltage ( |kV| )	3
	Capillary temp. (degrees C)	400		HILIC chromatography
	S-lens RF level	50			Column	Agilent 683775-924 InfinityLab Poroshell 120 HILIC-Z, 2.1 × 150 mm, 2.7 µm
					Composition of mobile phase solvent A:	5mM ammonium acetate, 0.2% acetic acid, 5uM methylenediphosphonic acid in water
FULL MS settings					Composition of mobile phase solvent B:	5mM ammonium acetate, 0.2% acetic acid in 95:5 v:v acetonitrile:water
	resolution	70000			Column compartment temperature:	held at 40 degrees C
	AGC target	3000000			Timetable:	Time (min)	Flow (mL/min)	%A	%B
	Max. IT	100ms				0	0.45	0	100
	Scan range	70-1050 m/z				1	0.45	0	100
	Spectrum data type	Centroid				11	0.45	11	89
						15.75	0.45	30	70
dd-MS2 settings						16.25	0.45	80	20
	resolution	17500				18.5	0.45	80	20
	AGC target	100000				18.6	0.45	0	100
	Max. IT	50 ms				21	0.45	0	100
	Loop count	2		Internal standards
	TopN	2			Component name	Vendor	Product SKU	Concentration
	isolation window (m/z)	1			13C,15N Cell Free Amino Acid Mixture	Sigma-Aldrich	767964-1EA	diluted 1:2000
	(N)CE /stepped nce	10,20,40			13C-a,a,-trehalose	Omicron	TRE-002	10 ug/mL
	Spectrum data type	Centroid			13C-mannitol	Omicron	ALD-030	10 ug/mL
dd settings
	Min. AGC target	1000
	Charge exclusion	>3
	Exclude isotope	on
	Dynamic exclusion	7 seconds
	An atlas of known m/z, retention time and fragmentation patterns from a library of reference standards was compared to the sample files. Match details for the three evaluated parameters are specified as difference from the theoretical value. Identification levels as specified by the Mass Spectrometry Initiative Metabolomics. 2007 Sep; 3(3): 211–221. DOI: 10.1007/s11306-007-0082-2] are indicated. …
